# Supplementary material for: Glucocorticoid activation by HSD11B1 limits T cell-driven interferon signaling and response to PD-1 blockade in melanoma
Source: HighWire-hosted journal article supplement (doi:10.1136/jitc-2021-004150), 2023-04-01
Supplement: jitc-2021-004150supp001_data_supplement.pdf [file jitc-2021-004150supp001_data_supplement.pdf]

**Table S5: Oligonucleotides used for CRISPR/SpCas9-mediated knockouts in this study.**

| Gene    | Oligonucleotides (5' to 3') |
|---------|-----------------------------|
| Hsd11b1 | caccGTCACTGGGGCCAGCAAA      |
|         | aaacTTTGCTGGCCCCAGTGAC      |

Abbreviations: CRISPR/SpCas9, Clustered Regularly Interspaced Short Palindromic Repeat/  
Streptococcus pyogenes Cas9
