# Supplementary material for: Glucocorticoid activation by HSD11B1 limits T cell-driven interferon signaling and response to PD-1 blockade in melanoma
Source: HighWire-hosted journal article supplement (doi:10.1136/jitc-2021-004150), 2023-04-01
Supplement: jitc-2021-004150supp006_data_supplement.pdf [file jitc-2021-004150supp006_data_supplement.pdf]

A

| NAME                                       | SIZE | ES         | NES       | NOM p-val    | FDR q-val    |
|--------------------------------------------|------|------------|-----------|--------------|--------------|
| HALLMARK_INTERFERON_GAMMA_RESPONSE         | 162  | 0.82818174 | 3.769457  | 0.0          | 0.0          |
| HALLMARK_INTERFERON_ALPHA_RESPONSE         | 80   | 0.822985   | 3.3652632 | 0.0          | 0.0          |
| HALLMARK_ALLOGRAFT_REJECTION               | 131  | 0.75538087 | 3.3276742 | 0.0          | 0.0          |
| HALLMARK_INFLAMMATORY_RESPONSE             | 119  | 0.75865096 | 3.313479  | 0.0          | 0.0          |
| HALLMARK_TNFA_SIGNALING_VIA_NFKB           | 146  | 0.6971366  | 3.1485534 | 0.0          | 0.0          |
| HALLMARK_IL6_JAK_STAT3_SIGNALING           | 64   | 0.7630497  | 3.0116842 | 0.0          | 0.0          |
| HALLMARK_COMPLEMENT                        | 110  | 0.6383073  | 2.7192578 | 0.0          | 0.0          |
| HALLMARK_COAGULATION                       | 69   | 0.6645757  | 2.6630385 | 0.0          | 0.0          |
| HALLMARK_KRAS_SIGNALING_UP                 | 125  | 0.59899926 | 2.6365316 | 0.0          | 0.0          |
| HALLMARK_IL2_STAT5_SIGNALING               | 141  | 0.5870388  | 2.6272225 | 0.0          | 0.0          |
| HALLMARK_P53_PATHWAY                       | 159  | 0.52139574 | 2.3485548 | 0.0          | 0.0          |
| HALLMARK_EPITHELIAL_MESENCHYMAL_TRANSITION | 123  | 0.5310159  | 2.320914  | 0.0          | 0.0          |
| HALLMARK_APOPTOSIS                         | 128  | 0.50832146 | 2.2347293 | 0.0          | 0.0          |
| HALLMARK_REACTIVE_OXYGEN_SPECIES_PATHWAY   | 38   | 0.5886307  | 2.0312104 | 0.0          | 1.8083333E-4 |
| HALLMARK_MYOGENESIS                        | 123  | 0.4118246  | 1.8249516 | 0.0          | 0.0013806964 |
| HALLMARK_APICAL_JUNCTION                   | 120  | 0.40743148 | 1.7790085 | 0.0          | 0.0020232992 |
| HALLMARK_TGF_BETA_SIGNALING                | 45   | 0.49098754 | 1.7678022 | 0.0          | 0.0023420476 |
| HALLMARK_APICAL_SURFACE                    | 23   | 0.57444316 | 1.7604934 | 0.0062240665 | 0.002388884  |
| HALLMARK_UV_RESPONSE_UP                    | 110  | 0.40726253 | 1.7577766 | 0.0          | 0.0023111408 |
| HALLMARK_XENOBIOTIC_METABOLISM             | 117  | 0.39931688 | 1.7152885 | 0.0          | 0.0031553935 |
| HALLMARK_HYPOXIA                           | 146  | 0.37660903 | 1.6752298 | 0.0          | 0.0043846117 |
| HALLMARK_ANGIOGENESIS                      | 25   | 0.50647223 | 1.6348407 | 0.015151516  | 0.0061984058 |
| HALLMARK_PI3K_AKT_MTOR_SIGNALING           | 84   | 0.3574547  | 1.4587454 | 0.015021459  | 0.027712682  |
| HALLMARK_ESTROGEN_RESPONSE_EARLY           | 118  | 0.32281712 | 1.3854592 | 0.039447732  | 0.048783235  |

B

| NAME                           | SIZE | ES          | NES        | NOM p-val    | FDR q-val    |
|--------------------------------|------|-------------|------------|--------------|--------------|
| HALLMARK_E2F_TARGETS           | 171  | -0.717617   | -3.3438206 | 0.0          | 0.0          |
| HALLMARK_G2M_CHECKPOINT        | 176  | -0.6518687  | -3.03814   | 0.0          | 0.0          |
| HALLMARK_MYC_TARGETS_V1        | 176  | -0.5908284  | -2.7586758 | 0.0          | 0.0          |
| HALLMARK_MYC_TARGETS_V2        | 53   | -0.61427283 | -2.330544  | 0.0          | 0.0          |
| HALLMARK_MITOTIC_SPINDLE       | 181  | -0.42779303 | -2.0100524 | 0.0          | 2.6190476E-4 |
| HALLMARK_SPERMATOGENESIS       | 53   | -0.48224705 | -1.8455726 | 0.0018832391 | 0.0012595418 |
| HALLMARK_DNA_REPAIR            | 121  | -0.3549868  | -1.5644363 | 0.0          | 0.016240396  |
| HALLMARK_MTORC1_SIGNALING      | 186  | -0.32990193 | -1.5464827 | 0.0          | 0.016532017  |
| HALLMARK_FATTY_ACID_METABOLISM | 109  | -0.33336532 | -1.442712  | 0.015503876  | 0.040354993  |

**Supplemental table S1. GSEA results comparing ACT-treated versus non-treated B16F1 melanomas early during treatment.**  
(A) Gene sets with positive enrichments scores (= up in ACT-treated). (B) Gene sets with negative enrichments scores (= down in ACT-treated). NOM p-val=0.0 corresponds to p<0.001. (N)ES: (normalized) enrichments score. FDR; false discovery rate.
