# Supplementary material for: Glucocorticoid activation by HSD11B1 limits T cell-driven interferon signaling and response to PD-1 blockade in melanoma
Source: HighWire-hosted journal article supplement (doi:10.1136/jitc-2021-004150), 2023-04-01
Supplement: jitc-2021-004150supp007_data_supplement.pdf [file jitc-2021-004150supp007_data_supplement.pdf]

Figure S2

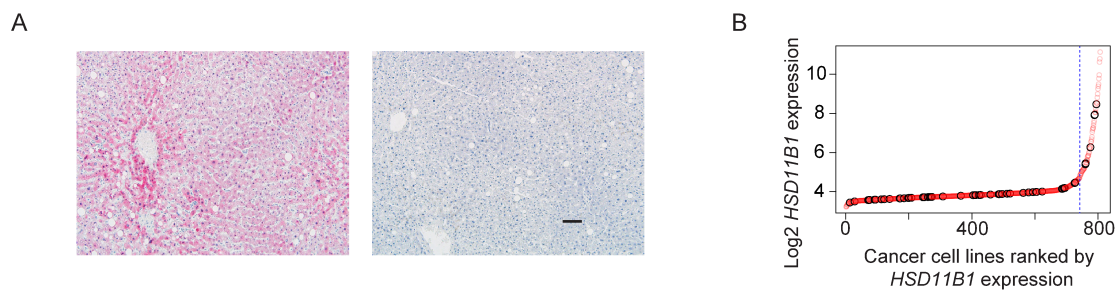**Supplementary Figure 2. HSD11B1 expression in the liver and human melanoma cell lines.**

(A) Immunohistochemistry of HSD11B1 in human liver. Scale bar = 50  $\mu$ m.

(B) HSD11B1 expression (log2) in 807 cancer cell lines of the CCLE by Affymetrix microarray. Melanoma cell lines (n=54) highlighted by black circles.
