# Supplementary material for: Glucocorticoid activation by HSD11B1 limits T cell-driven interferon signaling and response to PD-1 blockade in melanoma
Source: HighWire-hosted journal article supplement (doi:10.1136/jitc-2021-004150), 2023-04-01
Supplement: jitc-2021-004150supp008_data_supplement.pdf [file jitc-2021-004150supp008_data_supplement.pdf]

Supplementary Table 2: Patients characteristics and clinical data.

| Characteristics         |                      |
|-------------------------|----------------------|
| Patients, n             | 24                   |
| Matched-pair, n         | 4                    |
| Metastasis, n           |                      |
| Skin                    | 21                   |
| Lung                    | 1                    |
| Lymph node              | 2                    |
| Gender, n               | Age (years $\pm$ SD) |
| Female, 8               | 68 $\pm$ 13          |
| Male, 16                | 63 $\pm$ 15          |
| Therapy, n patients     |                      |
| Pembrolizumab           | 14                   |
| Nivolumab               | 10                   |
| Clinical outcome, n (%) |                      |
| PD                      | 11                   |
| PR                      | 4                    |
| SD                      | 6                    |
| CR                      | 3                    |

PD: progressive disease; PR: partial response; SD: stable disease; CR: complete response
