# Supplementary material for: Glucocorticoid activation by HSD11B1 limits T cell-driven interferon signaling and response to PD-1 blockade in melanoma
Source: HighWire-hosted journal article supplement (doi:10.1136/jitc-2021-004150), 2023-04-01
Supplement: jitc-2021-004150supp009_data_supplement.pdf [file jitc-2021-004150supp009_data_supplement.pdf]

A

| NAME                               | SIZE | ES         | NES       | NOM p-val   | FDR q-val    |
|------------------------------------|------|------------|-----------|-------------|--------------|
| HALLMARK_INTERFERON_ALPHA_RESPONSE | 74   | 0.7147997  | 2.701154  | 0.0         | 0.0          |
| HALLMARK_INTERFERON_GAMMA_RESPONSE | 142  | 0.64879125 | 2.6742682 | 0.0         | 0.0          |
| HALLMARK_ALLOGRAFT_REJECTION       | 91   | 0.53649336 | 2.1006086 | 0.0         | 0.0          |
| HALLMARK_INFLAMMATORY_RESPONSE     | 83   | 0.5240015  | 2.0065818 | 0.0         | 0.0          |
| HALLMARK_COMPLEMENT                | 92   | 0.50774217 | 1.96035   | 0.0         | 1.945946E-4  |
| HALLMARK_IL6_JAK_STAT3_SIGNALING   | 44   | 0.5621248  | 1.9068547 | 0.0         | 9.843857E-4  |
| HALLMARK_OXIDATIVE_PHOSPHORYLATION | 170  | 0.44374618 | 1.89804   | 0.0         | 8.4375916E-4 |
| HALLMARK_KRAS_SIGNALING_UP         | 100  | 0.45809048 | 1.8031284 | 0.0         | 0.0024285933 |
| HALLMARK_HYPOXIA                   | 135  | 0.42461038 | 1.7468218 | 0.0         | 0.0044223834 |
| HALLMARK_PI3K_AKT_MTOR_SIGNALING   | 85   | 0.45153704 | 1.7463474 | 0.0         | 0.003980145  |
| HALLMARK_COAGULATION               | 59   | 0.46995404 | 1.6972476 | 0.002728513 | 0.0048601115 |
| HALLMARK_IL2_STAT5_SIGNALING       | 122  | 0.36895782 | 1.5050087 | 0.007444169 | 0.042797077  |
| HALLMARK_APOPTOSIS                 | 106  | 0.3735777  | 1.4838812 | 0.012820513 | 0.049013812  |
| HALLMARK_APICAL_JUNCTION           | 105  | 0.366879   | 1.4703022 | 0.016795866 | 0.052129544  |
| HALLMARK_TNFA_SIGNALING_VIA_NFKB   | 124  | 0.36338362 | 1.4645097 | 0.011235955 | 0.051928267  |

B

| NAME                                | SIZE | ES          | NES        | NOM p-val   | FDR q-val   |
|-------------------------------------|------|-------------|------------|-------------|-------------|
| HALLMARK_G2M_CHECKPOINT             | 178  | -0.45532104 | -2.293512  | 0.0         | 0.0         |
| HALLMARK_E2F_TARGETS                | 177  | -0.45066673 | -2.258981  | 0.0         | 0.0         |
| HALLMARK_MYC_TARGETS_V1             | 176  | -0.34090087 | -1.7291223 | 0.0         | 0.01172436  |
| HALLMARK_MYC_TARGETS_V2             | 54   | -0.4226604  | -1.7207888 | 0.003717472 | 0.008793269 |
| HALLMARK_WNT_BETA_CATENIN_SIGNALING | 20   | -0.50100756 | -1.6036451 | 0.016216217 | 0.016866626 |

**Supplemental table S3. GSEA results comparing non-treated CM melanomas versus non-treated LN melanomas.**  
**(A)** Gene sets with positive enrichments scores (= up in CM). **(B)** Gene sets with negative enrichments scores (= down in CM). NOM p-val=0.0 corresponds to p<0.001. (N)ES: (normalized) enrichments score. FDR; false discovery rate.
