# Supplementary material for: Glucocorticoid activation by HSD11B1 limits T cell-driven interferon signaling and response to PD-1 blockade in melanoma
Source: HighWire-hosted journal article supplement (doi:10.1136/jitc-2021-004150), 2023-04-01
Supplement: jitc-2021-004150supp010_data_supplement.pdf [file jitc-2021-004150supp010_data_supplement.pdf]

A

| NAME                               | SIZE | ES         | NES       | NOM p-val   | FDR q-val  |
|------------------------------------|------|------------|-----------|-------------|------------|
| HALLMARK_INTERFERON_ALPHA_RESPONSE | 76   | 0.6876689  | 2.7127357 | 0.0         | 0.0        |
| HALLMARK_INTERFERON_GAMMA_RESPONSE | 151  | 0.57989234 | 2.596712  | 0.0         | 0.0        |
| HALLMARK_HYPOXIA                   | 140  | 0.31747052 | 1.3981382 | 0.023054754 | 0.29256186 |
| HALLMARK_INFLAMMATORY_RESPONSE     | 101  | 0.32413366 | 1.3591833 | 0.04024768  | 0.3044521  |
| HALLMARK_OXIDATIVE_PHOSPHORYLATION | 171  | 0.29614064 | 1.3367879 | 0.034901366 | 0.2947836  |

B

| NAME                               | SIZE | ES         | NES       | NOM p-val    | FDR q-val    |
|------------------------------------|------|------------|-----------|--------------|--------------|
| HALLMARK_INTERFERON_GAMMA_RESPONSE | 151  | 0.7310796  | 3.5247443 | 0.0          | 0.0          |
| HALLMARK_INTERFERON_ALPHA_RESPONSE | 76   | 0.7948779  | 3.37133   | 0.0          | 0.0          |
| HALLMARK_ALLOGRAFT_REJECTION       | 115  | 0.5192883  | 2.4068158 | 0.0          | 0.0          |
| HALLMARK_INFLAMMATORY_RESPONSE     | 101  | 0.49083138 | 2.2173204 | 0.0          | 0.0          |
| HALLMARK_IL6_JAK_STAT3_SIGNALING   | 53   | 0.5114701  | 1.984661  | 0.0          | 6.2423653E-4 |
| HALLMARK_IL2_STAT5_SIGNALING       | 134  | 0.36817843 | 1.7503326 | 0.0          | 0.006220676  |
| HALLMARK_KRAS_SIGNALING_UP         | 121  | 0.34055185 | 1.5680463 | 0.0          | 0.0325136    |
| HALLMARK_COMPLEMENT                | 104  | 0.33973402 | 1.5299019 | 0.0055658626 | 0.038914744  |
| HALLMARK_HYPOXIA                   | 140  | 0.3210342  | 1.5245386 | 0.0017241379 | 0.036534436  |

C

| NAME                  | SIZE | ES          | NES        | NOM p-val    | FDR q-val   |
|-----------------------|------|-------------|------------|--------------|-------------|
| HALLMARK_ADIPOGENESIS | 160  | -0.38074797 | -1.8496164 | 0.0          | 0.008797424 |
| HALLMARK_E2F_TARGETS  | 180  | -0.31548393 | -1.5805159 | 0.0032051282 | 0.07708941  |

D

| NAME                               | SIZE | ES          | NES        | NOM p-val    | FDR q-val    |
|------------------------------------|------|-------------|------------|--------------|--------------|
| HALLMARK_E2F_TARGETS               | 180  | -0.59575105 | -3.0263436 | 0.0          | 0.0          |
| HALLMARK_MYC_TARGETS_V1            | 177  | -0.49817848 | -2.5500927 | 0.0          | 0.0          |
| HALLMARK_G2M_CHECKPOINT            | 181  | -0.44648767 | -2.269467  | 0.0          | 0.0          |
| HALLMARK_MYC_TARGETS_V2            | 54   | -0.503158   | -2.0923288 | 0.0          | 2.2368421E-4 |
| HALLMARK_UNFOLDED_PROTEIN_RESPONSE | 98   | -0.3581522  | -1.651485  | 0.0          | 0.01554688   |
| HALLMARK_MTORC1_SIGNALING          | 185  | -0.32243988 | -1.6477787 | 0.0026041667 | 0.013246523  |
| HALLMARK_DNA_REPAIR                | 120  | -0.3372135  | -1.6250446 | 0.0          | 0.014031643  |
| HALLMARK_OXIDATIVE_PHOSPHORYLATION | 171  | -0.29370216 | -1.4850502 | 0.0023584906 | 0.036249034  |
| HALLMARK_CHOLESTEROL_HOMEOSTASIS   | 54   | -0.3575968  | -1.4737701 | 0.027972028  | 0.034740392  |

**Supplemental table S4. GSEA results comparing CBX or anti-PD-1 treated CM melanomas versus non-treated CM melanomas.**  
(A) Gene sets with positive enrichments scores (= up in CBX treated). (B) Gene sets with positive enrichments scores (= up in anti-PD-1 treated). (C) Gene sets with negative enrichments scores (= down in CBX treated). (D) Gene sets with negative enrichments scores (= down in anti-PD-1 treated). NOM p-val=0.0 corresponds to p<0.001. (N)ES: (normalized) enrichments score. FDR; false discovery rate.
