# Supplementary material for: Glucocorticoid activation by HSD11B1 limits T cell-driven interferon signaling and response to PD-1 blockade in melanoma
Source: HighWire-hosted journal article supplement (doi:10.1136/jitc-2021-004150), 2023-04-01
Supplement: jitc-2021-004150supp011_data_supplement.pdf [file jitc-2021-004150supp011_data_supplement.pdf]

Figure S4

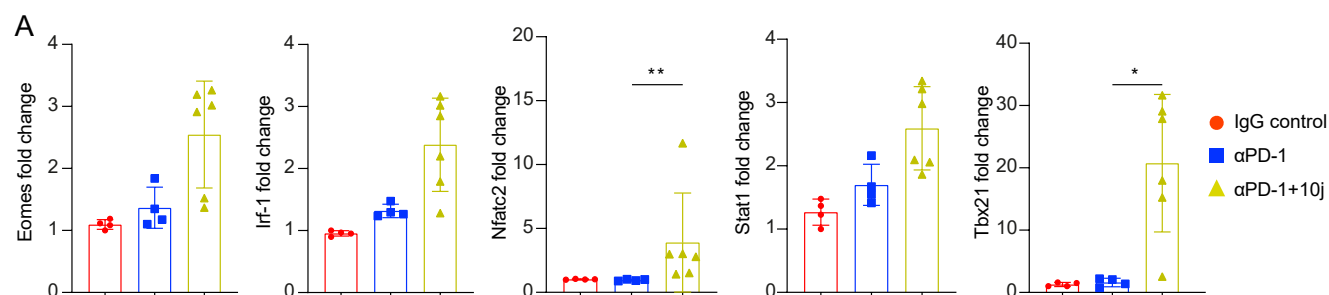

**Supplementary Figure 4. Upregulation of interferon gamma (IFN-γ)-dependent transcription factors in CD8+ T cells under co-therapy with αPD-1 and HSD11B1 inhibition.**

(A) Quantitative analyses of the immunomodulatory transcription factors Eomesodermin (Eomes), Interferon regulatory factor 1 (Irf-1), Nuclear factor of activated T-cells cytoplasmic 2 (Nfatc2), Signal transducer and activator of transcription 1 (Stat1) and the T-box transcription factor T-bet (Tbx21) in CD8+ T cells isolated from CM melanomas under indicated treatment conditions (n=2). Kruskal-Wallis test. Statistics: \*p<0.05, \*\*p<0.01.
