# Supplementary material for: Glucocorticoid activation by HSD11B1 limits T cell-driven interferon signaling and response to PD-1 blockade in melanoma
Source: HighWire-hosted journal article supplement (doi:10.1136/jitc-2021-004150), 2023-04-01
Supplement: jitc-2021-004150supp012_data_supplement.pdf [file jitc-2021-004150supp012_data_supplement.pdf]

Figure S3

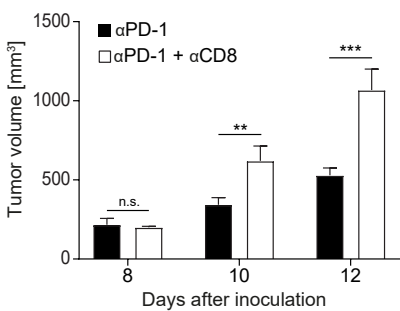

**Supplementary Figure 3. αPD-1 monotherapy is severely affected in established tumors by CD8<sup>+</sup> T cells depletion.**  
Statistics: \*\*p<0.01, \*\*\*p<0.001.
